# Supplementary material for: DNA methylation of tumor associated calcium signal transducer 2 (TACSTD2) loci shows association with clinically aggressive renal cell cancers
Source: PubMed Central journal article supplement (PMC8061065; doi:10.1186/s12885-021-08172-1), 2021-04-21

**DNA methylation of Tumor Associated Calcium Signal Transducer 2 (*TACSTD2*) loci shows association with clinically aggressive renal cell cancers**

Olga Katzendorn<sup>1°</sup>, Inga Peters<sup>1\*</sup>, Natalia Dubrowinskaja<sup>1</sup>, Hossein Tezval<sup>1</sup>, Pouriya Faraj Tabrizi<sup>1</sup>, Christoph A. von Klot<sup>1</sup>, Jörg Hennenlotter<sup>2</sup>, Marcel Lafos<sup>3</sup>, Markus A. Kuczyk<sup>1</sup>, Jürgen Serth<sup>1</sup>

<sup>1</sup>Department of Urology and Urologic Oncology, Hannover Medical School, Hannover, Germany

<sup>2</sup>Department of Urology, Eberhard Karls University of Tuebingen, Tuebingen, Germany

<sup>3</sup>Department of Pathology, Hannover Medical School, Hannover, Germany

**Running title:** Prognostic significance of TACSTD2 DNA methylation in RCC

**Key words:** TACSTD2, DNA methylation, renal cell carcinoma, prognosis, survival

**Conflict of Interest**

All authors declare that they have no conflict of interest.

° Authors contributed equally to this work

**\*Correspondence to:**

Inga Peters

Carl-Neuberg-Str. 1

Department of Urology and Urologic Oncology,

Hannover Medical School,

30625 Hannover, Germany

Peters.Inga@mh-hannover.de

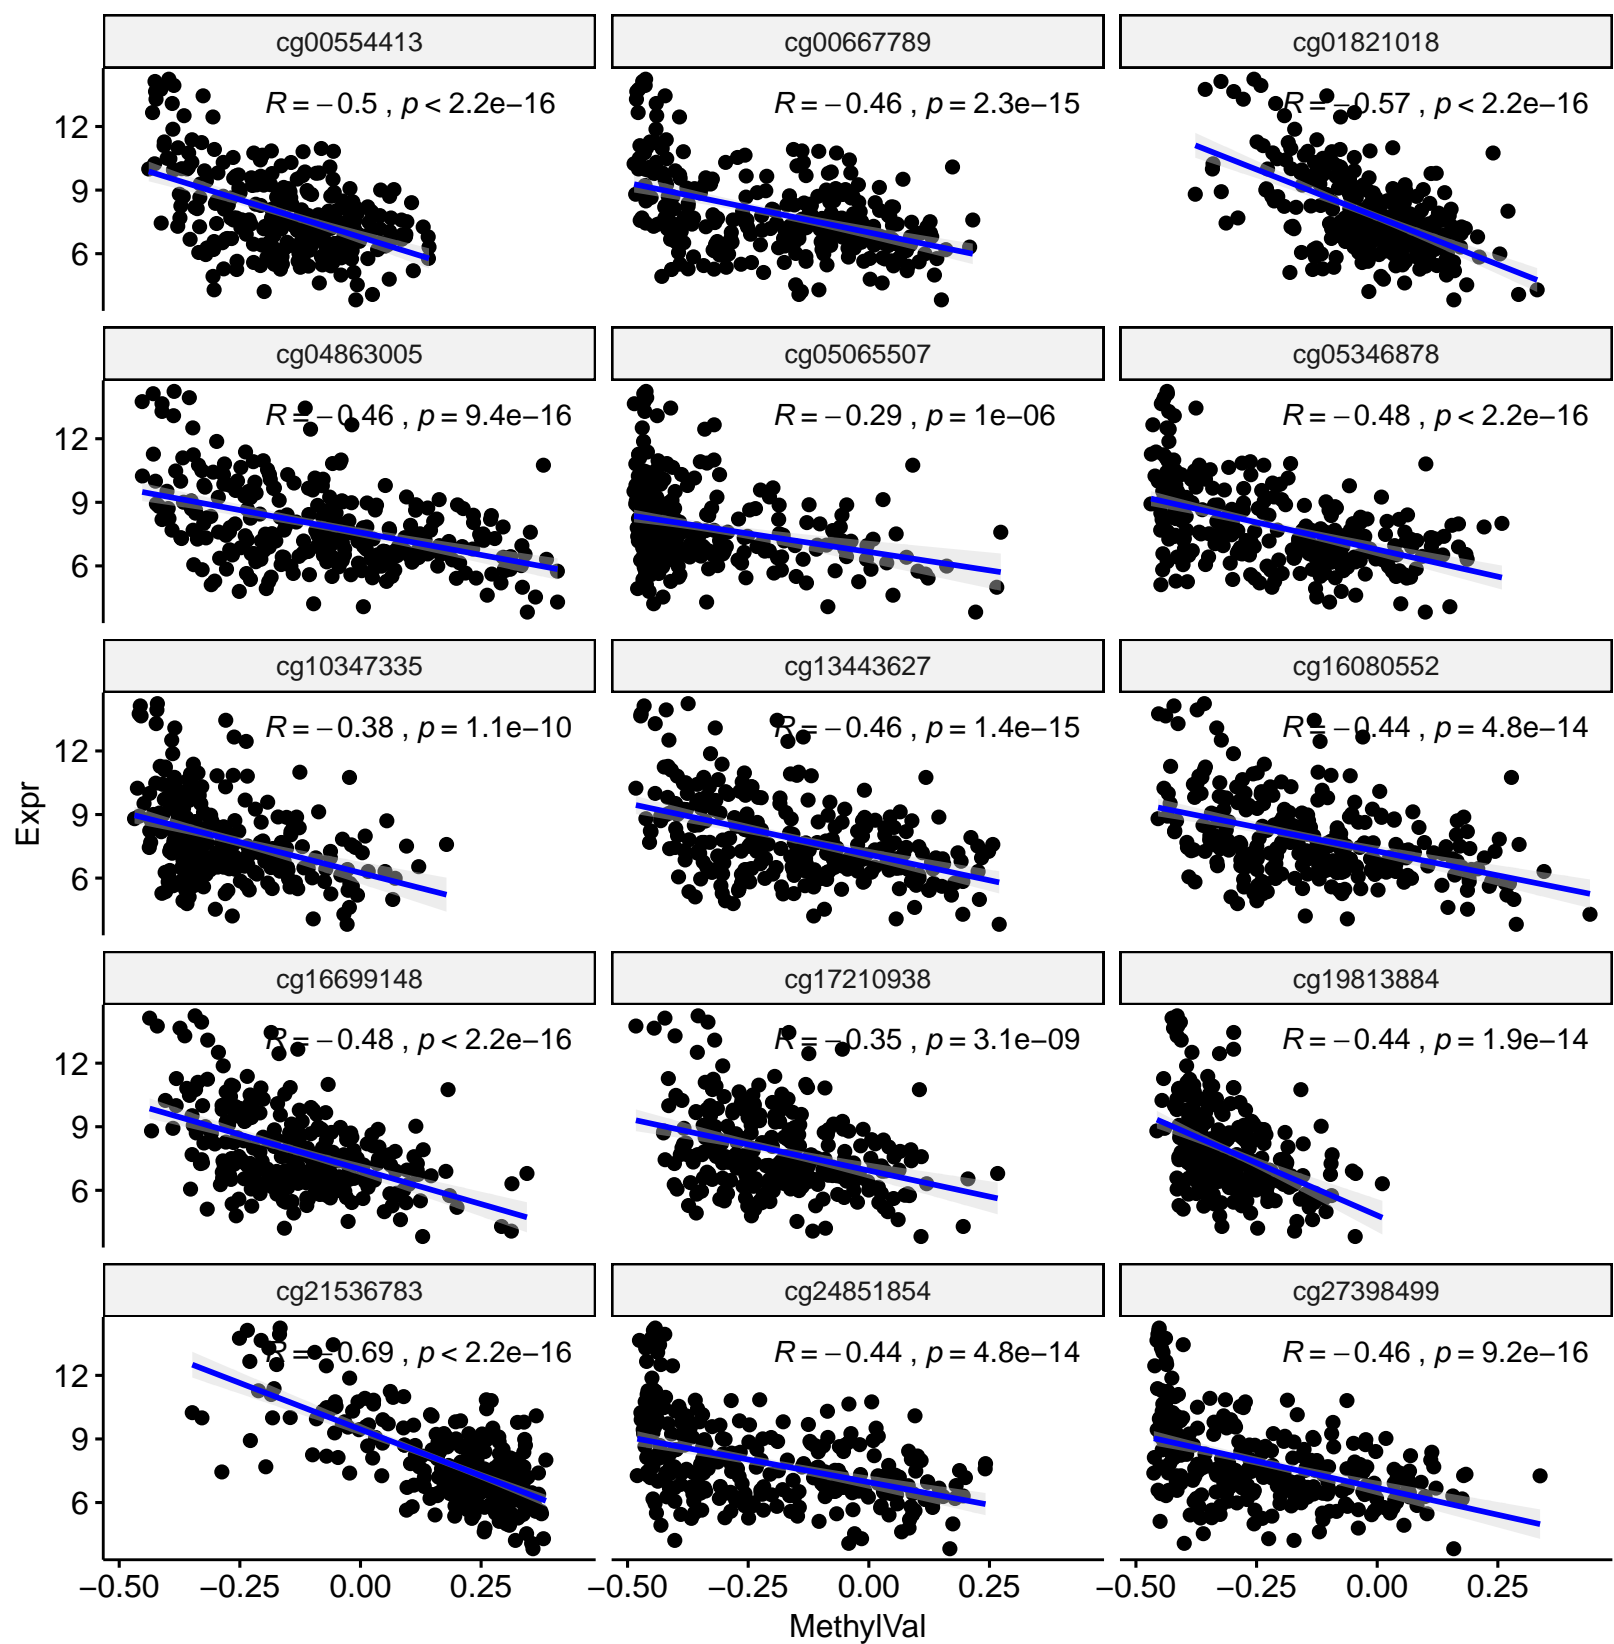

Supplement: 12885_2021_8172_MOESM1_ESM.pdf [file 12885_2021_8172_MOESM1_ESM.pdf]
