# Supplementary material for: DNA methylation of tumor associated calcium signal transducer 2 (TACSTD2) loci shows association with clinically aggressive renal cell cancers
Source: PubMed Central journal article supplement (PMC8061065; doi:10.1186/s12885-021-08172-1), 2021-04-21

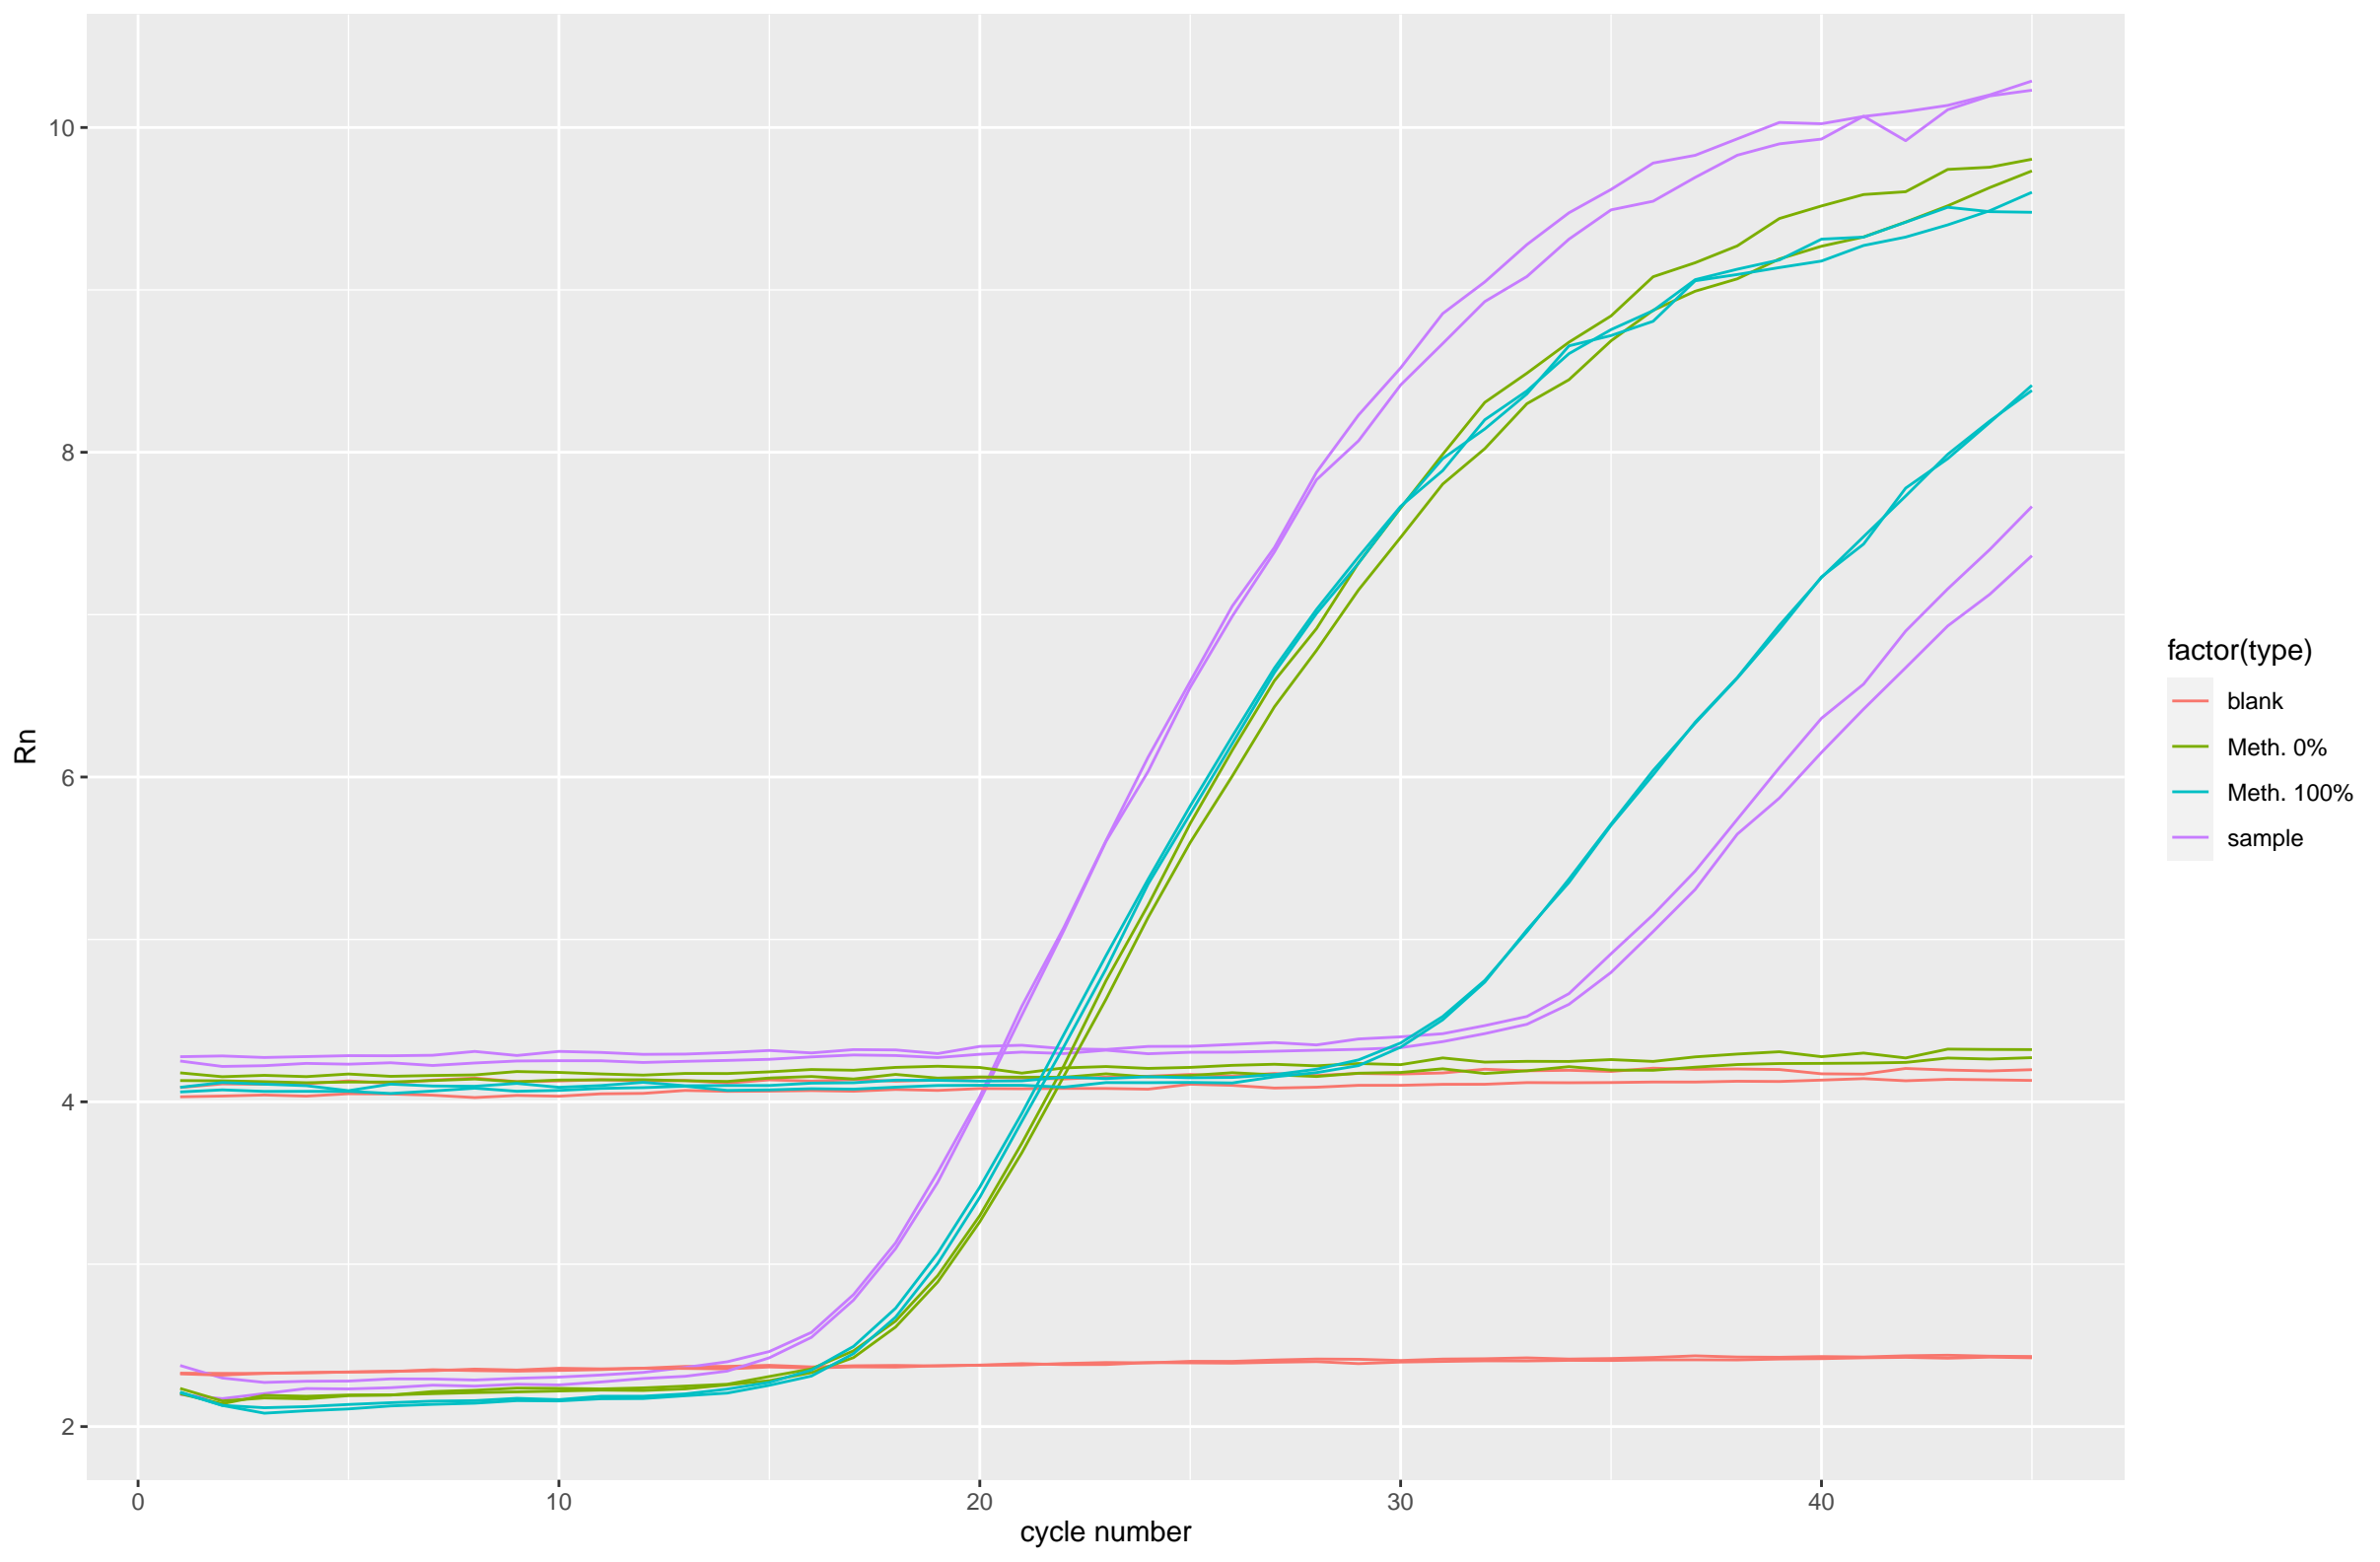

Supplement: 12885_2021_8172_MOESM2_ESM.pdf [file 12885_2021_8172_MOESM2_ESM.pdf]
